# Supplementary material for: A New Approach to Control the Enigmatic Activity of Aldose Reductase
Source: PubMed Central journal article supplement (PMC3760808; doi:10.1371/journal.pone.0074076), 2013-09-03
Supplement: pone.0074076.s007.pdf [file pone.0074076.s007.pdf]

**Table S1. Compounds Tested as Differential Aldose Reductase Inhibitors.**

|    |                                                                                     |    |                                                                                     |    |                                                                                       |
|----|-------------------------------------------------------------------------------------|----|-------------------------------------------------------------------------------------|----|---------------------------------------------------------------------------------------|
| 1  | 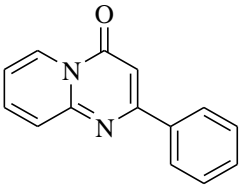   | 2  |    | 3  |    |
| 4  |    | 5  |    | 6  |    |
| 7  |    | 8  |   | 9  |    |
| 10 |   | 11 |   | 12 |   |
| 13 |  | 14 |  | 15 |  |
| 16 |  | 17 |  | 18 |  |
| 19 |  | 20 |  |    |                                                                                       |
