# Supplementary material for: A New Approach to Control the Enigmatic Activity of Aldose Reductase
Source: PubMed Central journal article supplement (PMC3760808; doi:10.1371/journal.pone.0074076), 2013-09-03
Supplement: pone.0074076.s008.pdf [file pone.0074076.s008.pdf]

**Table S2. Compounds Tested as Differential Aldose Reductase Inhibitors.**

|    |                                                                                    |    |                                                                                    |    |                                                                                     |
|----|------------------------------------------------------------------------------------|----|------------------------------------------------------------------------------------|----|-------------------------------------------------------------------------------------|
| 21 | 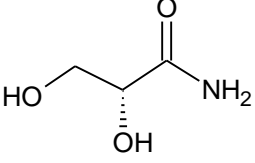  | 22 |   | 23 |  |
| 24 |   | 25 |  | 26 |  |
| 27 |   | 28 |  | 29 |  |
| 30 |  |    |                                                                                    |    |                                                                                     |
